# Supplementary material for: High WT1 Expression Is Associated with Very Poor Survival of Patients with Osteogenic Sarcoma Metastasis
Source: Oxford University Press journal article supplement (doi:10.1158/1078-0432.ccr-05-2307), 2006-07-15
Supplement: 10780432ccr052307-sup-supplementary_table_3.xls [file 10780432ccr052307-sup-supplementary_table_3.xls]

## Sheet: Sheet1
		Table S3. Clinical information of the high-grade osteosarcoma samples used in this study.
Patient ID	Age	Gender	Date of Dx	Histology	treatment	Met at Dx	Subsequent met	WT1 staining	Status	Follow-up(mo)
1	47	f	6-22-62	OOG	FQ	no	yes	low	DOD	54
2	11	f	9-12-60	OOG	aka (both)	no	yes	low	DOD	55
3	16	f	12-30-84	OOG	chemo res	no	yes	low	DOD	36
4	8	f	2-18-71	OOG	aka hp	no	yes	high	DOD	15
5	12	f	11-2-73	OOG	aka chemo res mx	yes	yes	low	DOD	20
6	60	f	11-29-73	OOG	res	yes	yes	high	DOD	4
7	15	f	2-8-80	OOG	aka chemo	no	yes	low	DOD	21
8	27	m	3-+15-74	OOG	aka chemo	yes	yes	low	DOD	6
9	19	m	4-8-74	OOG	aka	yes	yes	low	DOD	19
10	16	m	4-10-74	OOG	aka	no	yes	low	DOD	20
11	15	m	5-8-74	OOG	aka chemo	no	yes	low	ANED	321
12	19	f	5-16-74	OOG	aka res pm X2	no	yes	low	ANED	321
13	12	f	6-14-74	OOG	aka chemo	yes	yes	high	DOD	5
14	12	f	7-5-74	OOG	aka stamo res rorx	no	yes	low	DOD	44
15	2	f	7-25-74	OOG	chemo rx FQ chemo res pm	no	yes	high	DOD	7
16	72	f	8-22-74	OOG	bka res pm	no	yes	high	DOD	24
17	12	f	9-20-74	COG	bx	yes	yes	low	DOD	5
18	13	m	9-26-74	COG	aka	no	no	low	ANED	109
19	19	f	4-19-74	COG	bka chemo	no	yes	low	DOD	29
20	13	f	11-27-74	OOG	aka chemo ehs	no	no	low	DothD	10
21	23	m	12-12-74	COG	bka	no	no	low	ANED	186
22	18	m	1-17-75	OOG	bx chemo rorx	yes	yes	high	DOD	12
23	41	f	2-17-75	OOG	aka res pm hp chemo	no	yes	low	ANED	334
24	66	m	3-28-75	FOG	disart chemo	no	no	high	DOD	89
25	29	m	4-11-75	OGS	disart chemo	no	yes	low	DOD	161
26	16	m	4-21-74	OOG	FQ chemo	no	yes	high	DOD	20
27	14	f	4-29-75	OOG	aka chemo	no	no	high	ANED	277
28	27	m	6-9-75	FOG	aka	no	no	low	ANED	313
29	27	m	8-28-87	OOG	aka	no	no	low	ANED	47
30	12	m	6-25-75	TOS	aka chemo res pm	no	yes	high	DOD	29
31	17	f	7-22-75	FOG	aka chemo	no	no	low	DOD	4
32	15	m	10-3-75	COG	aka res res pm	no	yes	low	ANED	313
33	16	m	12-23-75	OOG	aka chemo	no	yes	high	DOD	43
34	28	f	12-30-75	OOG	FQ chemo	no	no	low	ANED	208
35	31	m	1-16-76	FOG	hp chemo	no	yes	low	DOD	14
36	20	m	1-28-76	OOG	aka chemo res pm	no	yes	low	DOD	8
37	12	f	7-16-76	COG	aka	no	no	low	ANED	211
38	14	m	4-29-76	OOG	aka res pm	no	yes	low	DOD	65
39	29	m	5-19-76	OOG	hp	no	yes	high	DOD	24
40	10	m	6-15-76	OOG	bx	yes	yes	low	DOD	5
41	44	m	1958-10-20	FOG	not known	no	yes	low	DOD	48
42	11	m	1960-03-26	OOG	not known	no	yes	low	DOD	24
43	14	m	1960-04-24	OOG	AKA	no	yes	low	ANED	400
44	18	m	4-26-74	COG	bx rorx	no	yes	low	DOD	18
45	11	m	6-26-74	FOG	aka chemo roex	no	yes	low	DOD	262
46	9	m	12-18-74	FOG	FQ res pm	no	yes	low	DOD	10
47	25	f	6-17-75	FOG	res	no	no	low	ANED	337
48	16	f	9-15-75	OOG	disart chemo	no	yes	low	DOD	13
49	15	m	1984-05-30	COG	enbloc and vascfib	no	yes	low	DOD	36
			Abbreviations: OOG-osteoblastic osteogenic sarcoma; FOG-fibroblastic osteogenic sarcoma;
			TOS-telangiectic osteogenic sarcoma; FQ- forequarter amputaion; AKA - above-knee
			amputation; Chem- chemotherapy; Hp-hemipecvectomy; Disartic-disarticulatoin through
			joint; Dx-diagnosis; Bx-biopsy; Enbloc-enbloc resection(meaning limb sparing)
			Vascfib- vascularised fibula transfer. DOD- died of disease; ANED-alive with
			new disease; DothD-died of other disease; res-resection. Met-metastasis.
